# Supplementary material
Source: HighWire-hosted journal article supplement (https://bmjopenquality.bmj.com/content/12/3/e002316)
Supplement: inline-supplementary-material-2 [file inline-supplementary-material-2.pdf]

| Laboratory Test                                    | Cost (\$CAD) | Source                         |
|----------------------------------------------------|--------------|--------------------------------|
| CBC                                                | 12           | St. Paul's Hospital Laboratory |
| Differential                                       | 11.7         | St. Paul's Hospital Laboratory |
| Na <sup>+</sup> , K <sup>+</sup> , Cl <sup>-</sup> | 3            | St. Paul's Hospital Laboratory |
| Creatinine                                         | 1.5          | St. Paul's Hospital Laboratory |
| Urea                                               | 1            | St. Paul's Hospital Laboratory |
| Magnesium                                          | 7            | St. Paul's Hospital Laboratory |
| Phosphate                                          | 1.5          | St. Paul's Hospital Laboratory |
| Calcium                                            | 1.5          | St. Paul's Hospital Laboratory |
| ALP, ALT, AST, GGT                                 | 7.5          | St. Paul's Hospital Laboratory |
| Total bilirubin                                    | 1.6          | BC Ministry of Health          |
| Direct bilirubin                                   | 1.5          | St. Paul's Hospital Laboratory |
| Lipase                                             | 6.6          | BC Ministry of Health          |
| Amylase                                            | 5.3          | BC Ministry of Health          |
| Albumin                                            | 1.6          | BC Ministry of Health          |
| Total protein                                      | 1.6          | BC Ministry of Health          |
| INR/PTT                                            | 18.5         | St. Paul's Hospital Laboratory |

**Supplemental Table 10: Cost of each laboratory test. Prices for laboratory testing were obtained for St. Paul's Hospital, a tertiary care centre with previously calculated costs including labour, quality control, energy, consumables, and reagents. Similar data was unavailable at VGH. Abbreviations: CBC = Complete blood count, Na<sup>+</sup> = Sodium, K<sup>+</sup> = Potassium, Cl<sup>-</sup> = Chloride, ALP = Alkaline Phosphatase, ALT = Alanine Aminotransferase, AST = Aspartate Aminotransferase, GGT = Gamma-glutamyl Transferase, INR = International Normalized Ratio and PTT = Partial Thromboplastin Time. BC Ministry of Health website:**

[http://www.bccss.org/bcaplm-site/Documents/Programs/laboratory\\_services\\_schedule\\_of\\_fees.pdf](http://www.bccss.org/bcaplm-site/Documents/Programs/laboratory_services_schedule_of_fees.pdf).
