# Supplementary material
Source: HighWire-hosted journal article supplement (https://bmjopenquality.bmj.com/content/12/3/e002316)
Supplement: inline-supplementary-material-3 [file inline-supplementary-material-3.pdf]

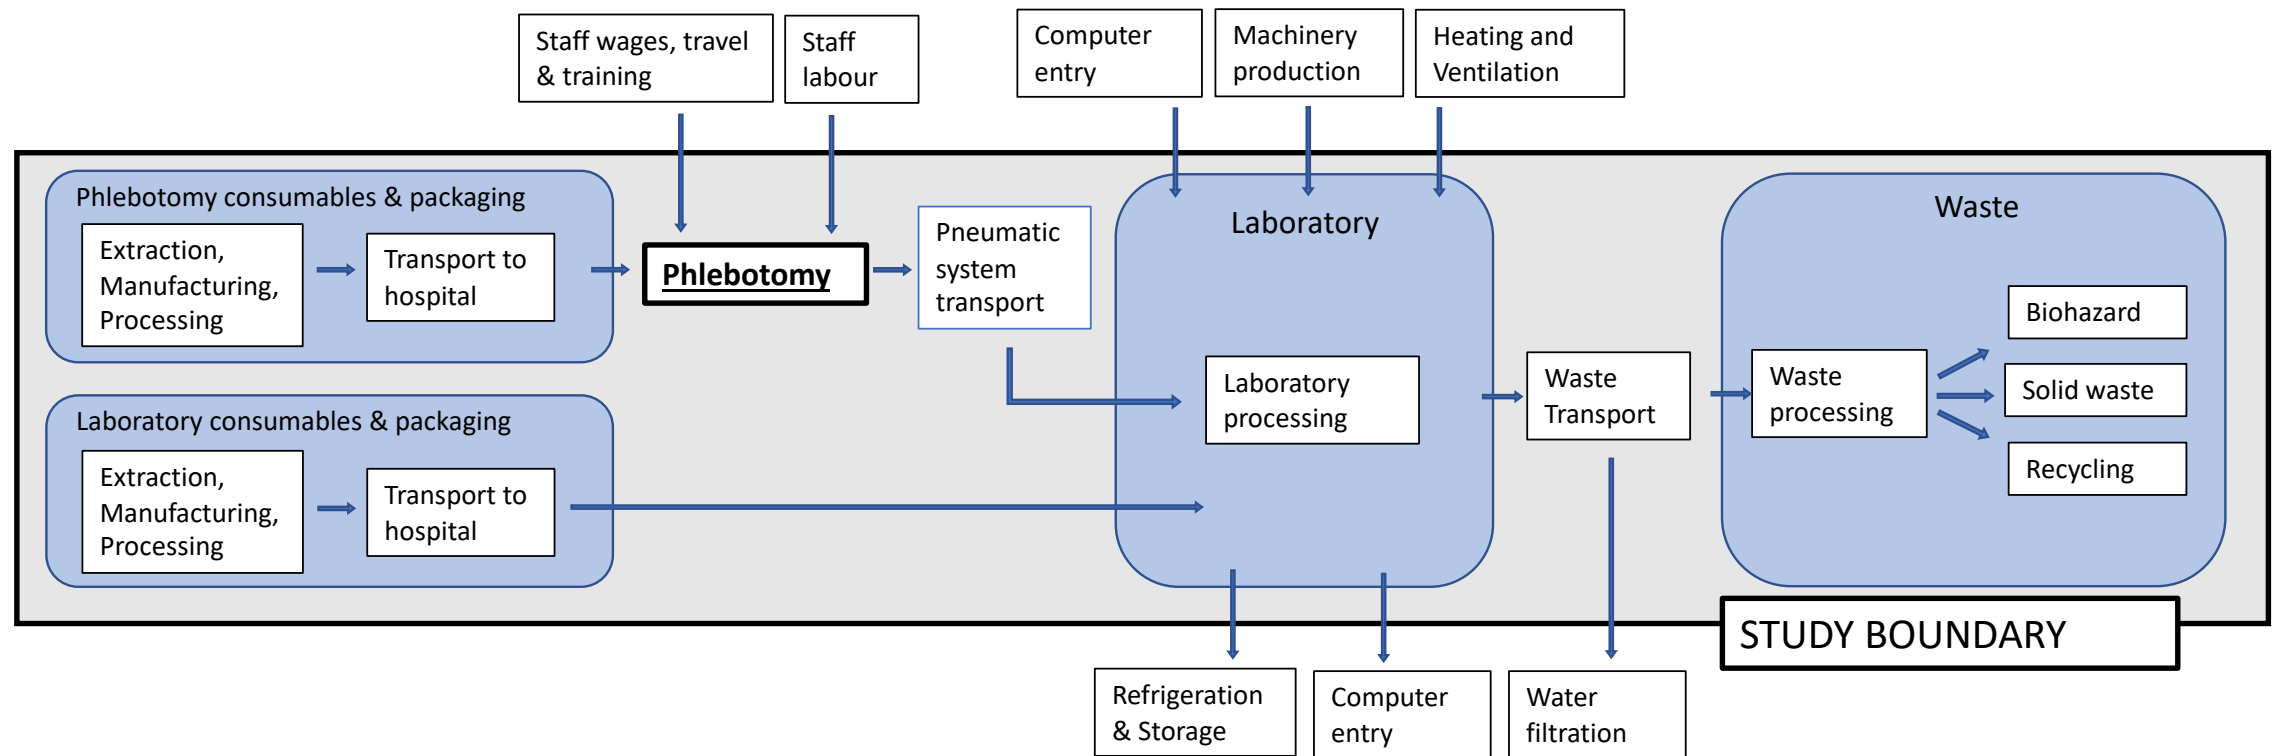

**Supplemental Figure 2: Study boundary depicting processes included in the calculation of the carbon footprint of laboratory investigations.**
