# Supplementary material
Source: HighWire-hosted journal article supplement (https://bmjopenquality.bmj.com/content/12/3/e002316)
Supplement: inline-supplementary-material-5 [file inline-supplementary-material-5.pdf]

|                                                  |     |
|--------------------------------------------------|-----|
| <b>Blood draws</b>                               | 115 |
| <b>Green vial: Chemistry</b>                     |     |
| Na <sup>+</sup> /K <sup>+</sup> /Cl <sup>-</sup> | 108 |
| Calcium                                          | 54  |
| Magnesium                                        | 56  |
| Phosphorus                                       | 56  |
| Creatinine                                       | 106 |
| Urea                                             | 106 |
| ALP/ALT/AST/GGT                                  | 41  |
| Direct bilirubin                                 | 39  |
| Total bilirubin                                  | 41  |
| Amylase                                          | 7   |
| Lipase                                           | 13  |
| Albumin                                          | 50  |
| <b>Total tests:</b>                              | 800 |
| <b>Total vials:</b>                              | 110 |
| <b>Blue vial: Coagulation factors</b>            |     |
| INR                                              | 26  |
| PTT                                              | 26  |
| <b>Total tests:</b>                              | 52  |
| <b>Total vials:</b>                              | 26  |
| <b>Purple vial: Hematology</b>                   |     |
| CBC                                              | 102 |
| Diff                                             | 70  |
| <b>Total tests:</b>                              | 172 |
| <b>Total vials:</b>                              | 102 |
| <b>Gold vial: Total protein</b>                  |     |
| Total protein                                    | 14  |
| <b>Total tests:</b>                              | 14  |
| <b>Total vials:</b>                              | 14  |

**Supplemental Table 1: Number of unnecessary tests and vials for each analyzed laboratory investigation.**

**Abbreviations:** Na<sup>+</sup> = Sodium, K<sup>+</sup> = Potassium, Cl<sup>-</sup> = Chloride, ALP = Alkaline Phosphatase, ALT = Alanine Aminotransferase, AST = Aspartate Aminotransferase, GGT = Gamma-glutamyl Transferase, INR = International Normalized Ratio and PTT = Partial Thromboplastin Time, CBC = Complete blood count, Diff = Differential

**\*Note:** Vial count for INR/PTT includes the excess vials wasted during phlebotomy (Supplemental materials: *"Blood collection and transport"*)
