# Supplementary material
Source: HighWire-hosted journal article supplement (https://bmjopenquality.bmj.com/content/12/3/e002316)
Supplement: inline-supplementary-material-6 [file inline-supplementary-material-6.pdf]

| <b>Process</b>           | <b>Phlebotomy</b> | <b>Green vial<br/>(Chemistry)</b> | <b>Blue vial<br/>(Coagulation factors)</b> | <b>Purple vial<br/>(Hematology)</b> | <b>Gold vial<br/>(Total protein)</b> | <b>Total emissions<br/>(g CO<sub>2</sub>e)</b> |
|--------------------------|-------------------|-----------------------------------|--------------------------------------------|-------------------------------------|--------------------------------------|------------------------------------------------|
| Consumable manufacturing | 10,707            | 6741                              | 1730                                       | 3010                                | 426                                  | <b>22,614</b>                                  |
| Consumable transport     | 2376              | 778                               | 568                                        | 436                                 | 56                                   | <b>4213</b>                                    |
| Laboratory processing    | 3904              | 28,925                            | 86                                         | 138                                 | 566                                  | <b>33,655</b>                                  |
| Waste                    | 318               | 228                               | 106                                        | 234                                 | 26                                   | <b>911</b>                                     |
| <b>Total</b>             | <b>17,305</b>     | <b>36,672</b>                     | <b>2489</b>                                | <b>3819</b>                         | <b>1073</b>                          | <b>61,358</b>                                  |

**Supplemental Table 2: Processes contributing to the carbon footprint of laboratory testing. This table breaks down life cycle processes contributing to the total carbon footprint for investigations across the sample population that underwent unnecessary bloodwork(N=63). Abbreviations: g CO<sub>2</sub>e = grams carbon dioxide equivalents.**
