# Supplementary material
Source: HighWire-hosted journal article supplement (https://bmjopenquality.bmj.com/content/12/3/e002316)
Supplement: inline-supplementary-material-7 [file inline-supplementary-material-7.pdf]

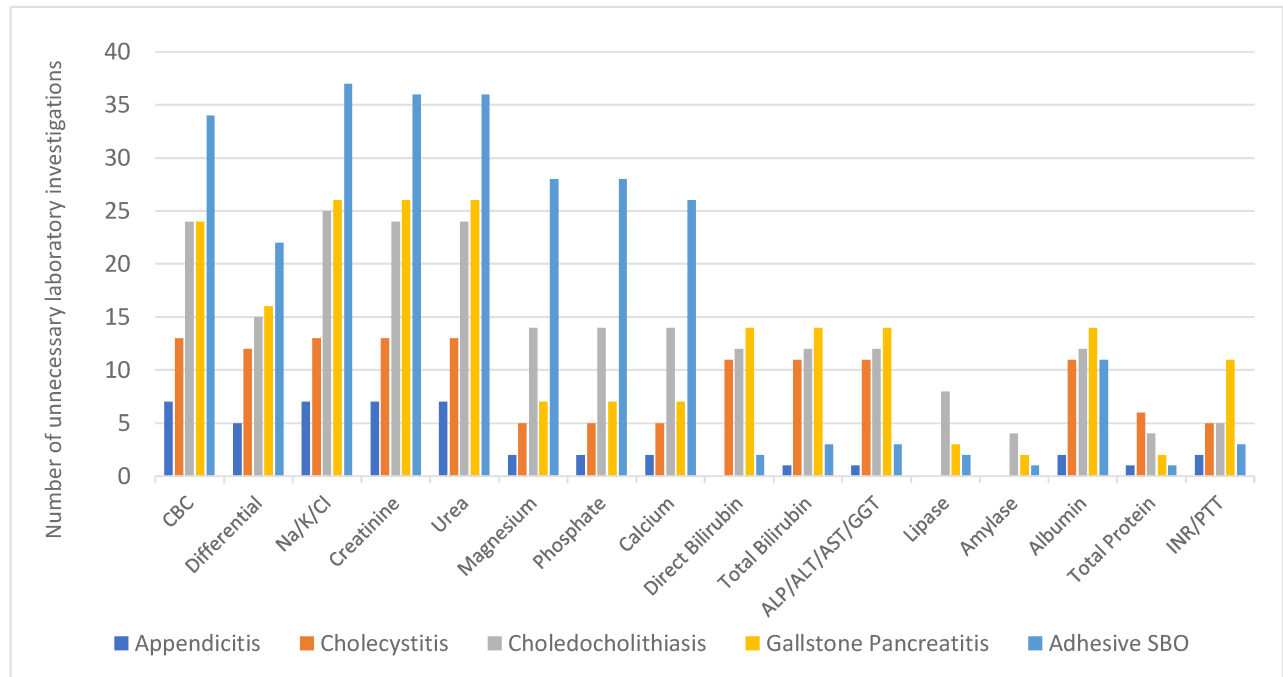

**Supplemental Figure 3: Per test breakdown of unnecessary laboratory tests performed for each surgical condition. Abbreviations: SBO = small bowel obstruction, CBC = Complete blood count, Na+ = Sodium, K+ = Potassium, Cl- = Chloride, ALP = Alkaline Phosphatase, ALT = Alanine Aminotransferase, AST = Aspartate Aminotransferase, GGT = Gamma-glutamyl Transferase, INR = International Normalized Ratio, and PTT = Partial Thromboplastin Time.**
