# Supplementary material
Source: HighWire-hosted journal article supplement (https://bmjopenquality.bmj.com/content/12/3/e002316)
Supplement: inline-supplementary-material-8 [file inline-supplementary-material-8.pdf]

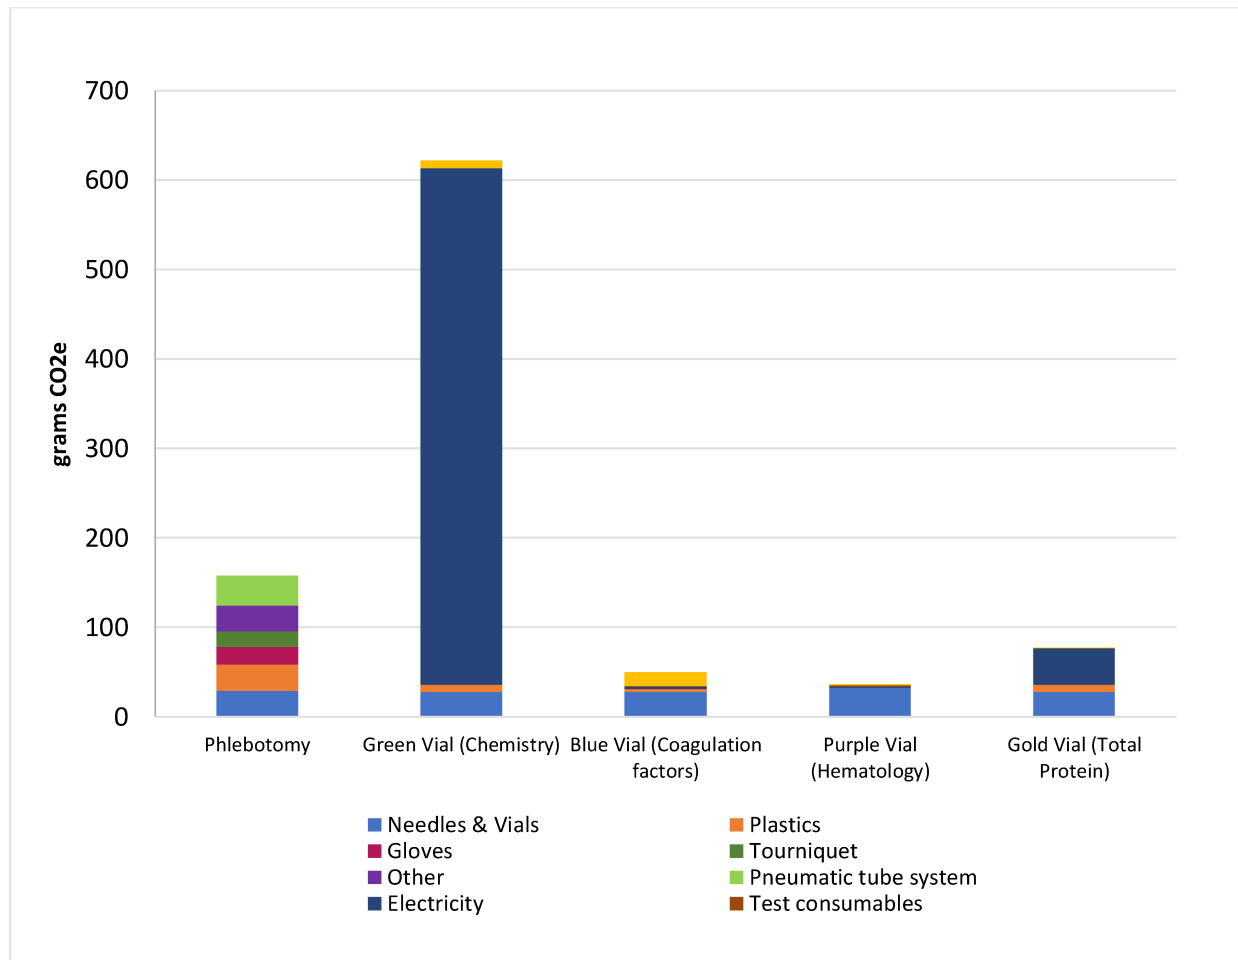

**Supplemental Figure 4: Sources of greenhouse gas emissions within each component of laboratory testing.** Abbreviations: g CO<sub>2</sub>e = grams carbon dioxide equivalents. "Other" includes sterile wipe, tape, gauze, food tray, and laboratory requisition forms.
